# Supplementary material
Source: publisher figshare collection journal article supplement (https://gsapubs.figshare.com/ndownloader/files/34981729)
Supplement: Supplementary file 1 [file 34981729]

## Sheet: Sheet1
Table S1. LA-ICP-MS results for zircon U-Pb ages of igneous samples from this study
Sample Analysis Spot				Corrected Isotopic Ratios						Corrected Ages (Ma)
number	Th (ppm)	U (ppm)	Th/U	206Pb/238U	1σ	207Pb/235U	1σ	207Pb/206Pb	1σ	206Pb/238U	1σ	207Pb/235U	1σ	207Pb/206Pb	1σ	Best Ages	1σ	Concordant ratio
Monzogranite sample LJ2020-47
sam.01	355.75	827.71	0.4298	0.06365	0.00084	0.48575	0.01162	0.05531	0.00129	398	5	402	8	425	30	398	5	101.005
sam.02	408.82	894.9	0.456833	0.06371	0.00083	0.46778	0.011	0.05322	0.00122	398	5	390	8	338	30	398	5	97.9899
sam.03	643.54	1231.42	0.5226	0.06429	0.00083	0.47828	0.00986	0.05392	0.00106	402	5	397	7	368	24	402	5	98.7562
sam.04	349.88	810.9	0.431471	0.06376	0.00084	0.47484	0.01166	0.05398	0.00129	398	5	395	8	370	32	398	5	99.2462
sam.05	655.37	1259.42	0.520374	0.06639	0.00087	0.49558	0.01122	0.0541	0.00119	414	5	409	8	375	28	414	5	98.7923
sam.06	585.48	660.3	0.886688	0.07334	0.001	0.55772	0.01483	0.05512	0.00144	456	6	450	10	417	35	456	6	98.6842
sam.07	529.75	1097.67	0.482613	0.06489	0.00085	0.4918	0.01064	0.05494	0.00114	405	5	406	7	410	26	405	5	100.247
sam.08	168.48	366.33	0.459913	0.06274	0.00091	0.46636	0.0174	0.05389	0.00201	392	6	389	12	366	58	392	6	99.2347
sam.09	530.46	1088.37	0.487389	0.06531	0.00085	0.47652	0.01016	0.05289	0.00108	408	5	396	7	324	26	408	5	97.0588
sam.10	562.37	1020.21	0.55123	0.06595	0.00086	0.4932	0.0105	0.05422	0.00111	412	5	407	7	380	26	412	5	98.7864
sam.11	391.36	941.16	0.415827	0.06337	0.00084	0.47215	0.01073	0.05401	0.00119	396	5	393	7	371	28	396	5	99.2424
sam.12	534.63	1025.64	0.521265	0.06485	0.00085	0.48198	0.01058	0.05388	0.00114	405	5	399	7	366	27	405	5	98.5185
sam.13	823.44	1582.84	0.520229	0.06842	0.00088	0.51642	0.00945	0.05472	0.00094	427	5	423	6	401	20	427	5	99.0632
sam.14	443.43	1016.99	0.436022	0.06418	0.00085	0.47751	0.0109	0.05395	0.00119	401	5	396	7	369	28	401	5	98.7531
sam.15	250.99	603.84	0.415656	0.06378	0.00088	0.46977	0.01329	0.0534	0.00149	399	5	391	9	346	39	399	5	97.995
sam.16	655.11	1150.58	0.569374	0.06649	0.00087	0.48991	0.01027	0.05344	0.00107	415	5	405	7	348	25	415	5	97.5904
sam.17	482.1	1012.53	0.476134	0.06501	0.00086	0.48438	0.01085	0.05404	0.00117	406	5	401	7	373	28	406	5	98.7685
sam.18	305.36	732.5	0.416874	0.06483	0.00088	0.48511	0.01257	0.05427	0.00138	405	5	402	9	382	34	405	5	99.2593
sam.19	506.48	1056.94	0.479195	0.06594	0.00088	0.49054	0.01083	0.05396	0.00115	412	5	405	7	369	27	412	5	98.301
sam.20	351.83	831.59	0.423081	0.06539	0.00088	0.45421	0.01111	0.05038	0.0012	408	5	380	8	213	32	408	5	93.1373
sam.21	451.19	946.41	0.476738	0.06505	0.00087	0.47842	0.01138	0.05335	0.00123	406	5	397	8	344	30	406	5	97.7833
sam.22	140.22	311.14	0.450665	0.06782	0.00103	0.49904	0.0196	0.05338	0.0021	423	6	411	13	345	61	423	6	97.1631
sam.23	501.44	1146.18	0.437488	0.06357	0.00086	0.45672	0.01143	0.05212	0.00127	397	5	382	8	291	33	397	5	96.2217
sam.24	838.88	1312.09	0.639346	0.06715	0.00089	0.50374	0.01024	0.05443	0.00105	419	5	414	7	389	23	419	5	98.8067
sam.25	421	964.82	0.436351	0.06603	0.00089	0.47232	0.01149	0.0519	0.00123	412	5	393	8	281	32	412	5	95.3883
Monzogranite sample LJ2020-23
sam.01	1172.8	383.3	3.05974	0.06477	0.00093	0.48209	0.01707	0.054	0.00191	405	6	400	12	371	54	405	6	98.7654
sam.02	1323.08	424.43	3.11731	0.06515	0.00092	0.48012	0.01596	0.05346	0.00177	407	6	398	11	348	50	407	6	97.7887
sam.03	693.54	3.21	216.056	0.06377	0.00098	0.49264	0.02292	0.05604	0.00262	399	6	407	16	454	76	399	6	102.005
sam.04	260.88	146.81	1.77699	0.06279	0.00107	0.4639	0.02828	0.0536	0.00329	393	6	387	20	354	107	393	6	98.4733
sam.05	813.42	369.01	2.20433	0.06388	0.00091	0.45403	0.01598	0.05157	0.00181	399	6	380	11	266	55	399	6	95.2381
sam.06	663.59	279.59	2.37344	0.06466	0.00095	0.49884	0.01901	0.05597	0.00213	404	6	411	13	451	58	404	6	101.733
sam.07	686.06	274.8	2.49658	0.06389	0.00094	0.44818	0.01846	0.05089	0.0021	399	6	376	13	236	68	399	6	94.2356
sam.08	1140.17	372.06	3.06448	0.0622	0.0009	0.4401	0.01668	0.05133	0.00194	389	5	370	12	256	60	389	5	95.1157
sam.09	730.51	310.01	2.35641	0.06476	0.00099	0.53891	0.02187	0.06037	0.00246	405	6	438	14	617	61	405	6	108.148
sam.10	993.77	319.98	3.10573	0.06327	0.00094	0.49533	0.01838	0.0568	0.00211	395	6	409	12	484	56	395	6	103.544
sam.11	1262.24	378.53	3.33458	0.06299	0.00089	0.47639	0.01615	0.05487	0.00185	394	5	396	11	407	51	394	5	100.508
sam.12	1079.96	337.71	3.19789	0.06365	0.00091	0.47698	0.01681	0.05436	0.00191	398	6	396	12	386	53	398	6	99.4975
sam.13	763.08	336.97	2.26453	0.06559	0.00097	0.50762	0.01899	0.05615	0.00211	410	6	417	13	458	57	410	6	101.707
sam.14	1223.28	469.08	2.60783	0.06481	0.0009	0.48027	0.01519	0.05376	0.00169	405	5	398	10	361	46	405	5	98.2716
sam.15	903.27	348.99	2.58824	0.0633	0.00091	0.4759	0.01713	0.05454	0.00196	396	6	395	12	393	55	396	6	99.7475
sam.16	943.94	370.87	2.5452	0.06606	0.00095	0.50653	0.01751	0.05563	0.00192	412	6	416	12	438	51	412	6	100.971
sam.17	430.13	196.34	2.19074	0.06515	0.00101	0.49681	0.02263	0.05532	0.00253	407	6	410	15	425	74	407	6	100.737
sam.18	658.78	430.92	1.52878	0.0643	0.0009	0.48281	0.01576	0.05447	0.00177	402	5	400	11	391	48	402	5	99.5025
sam.19	1000.38	310.61	3.22069	0.06392	0.00093	0.48507	0.01735	0.05505	0.00197	399	6	402	12	414	54	399	6	100.752
sam.20	677.5	319.12	2.12303	0.06378	0.00092	0.48644	0.01754	0.05533	0.00199	399	6	402	12	426	55	399	6	100.752
sam.21	1142.94	367.09	3.11351	0.06364	0.0009	0.479	0.01625	0.0546	0.00184	398	5	397	11	396	51	398	5	99.7487
sam.22	1456.11	432.21	3.36899	0.06668	0.00093	0.50888	0.01608	0.05537	0.00174	416	6	418	11	427	46	416	6	100.481
sam.23	1097.89	375.76	2.92179	0.06689	0.00094	0.51125	0.0168	0.05545	0.00181	417	6	419	11	430	48	417	6	100.48
sam.24	1375.88	459.55	2.99397	0.06611	0.00091	0.53264	0.01502	0.05845	0.00163	413	6	434	10	547	38	413	6	105.085
sam.25	1184.88	390.57	3.03372	0.06532	0.00092	0.47759	0.0162	0.05304	0.00179	408	6	396	11	331	51	408	6	97.0588
Hornblende gabbro sample LJ2020-14
sam.01	560.58	552.48	1.01466	0.06674	0.0009	0.5017	0.01442	0.05453	0.00155	416	5	413	10	393	40	416	5	99.2788
sam.02	178.32	316.61	0.563217	0.06984	0.001	0.51508	0.01953	0.05349	0.00203	435	6	422	13	350	60	435	6	97.0115
sam.03	484.5	890.01	0.544376	0.07056	0.0009	0.55393	0.01214	0.05694	0.00121	440	5	448	8	489	27	440	5	101.818
sam.04	916.78	1601.84	0.572329	0.06636	0.00083	0.50829	0.0094	0.05556	0.00098	414	5	417	6	435	21	414	5	100.725
sam.05	51.39	117.99	0.435545	0.06659	0.00116	0.50252	0.03414	0.05473	0.00375	416	7	413	23	401	121	416	7	99.2788
sam.06	473.03	913.07	0.518065	0.06948	0.00089	0.53708	0.01217	0.05607	0.00124	433	5	436	8	455	28	433	5	100.693
sam.07	205	379.82	0.539729	0.06613	0.00093	0.47924	0.01765	0.05257	0.00194	413	6	398	12	310	58	413	6	96.368
sam.08	145.1	260.86	0.556237	0.06899	0.00101	0.51579	0.0211	0.05423	0.00223	430	6	422	14	381	65	430	6	98.1395
sam.09	118.65	232.32	0.510718	0.06708	0.00101	0.49502	0.02207	0.05353	0.0024	419	6	408	15	351	73	419	6	97.3747
sam.10	229.74	406.4	0.565305	0.06831	0.00094	0.53041	0.01658	0.05632	0.00175	426	6	432	11	465	45	426	6	101.408
sam.11	542.57	814.51	0.666131	0.06681	0.00086	0.50812	0.01178	0.05516	0.00125	417	5	417	8	419	29	417	5	100
sam.12	187.2	312.35	0.599328	0.06581	0.00093	0.51507	0.01764	0.05677	0.00195	411	6	422	12	483	51	411	6	102.676
sam.13	66.96	128.71	0.520239	0.06538	0.00113	0.48025	0.03138	0.05328	0.00352	408	7	398	22	341	117	408	7	97.549
sam.14	546.37	883.19	0.618632	0.06887	0.00089	0.51852	0.01188	0.05461	0.00122	429	5	424	8	396	29	429	5	98.8345
sam.15	615.6	1052.57	0.584854	0.06767	0.00086	0.52605	0.01108	0.05639	0.00115	422	5	429	7	468	25	422	5	101.659
sam.16	207.79	490.38	0.423733	0.06622	0.00089	0.51558	0.01418	0.05647	0.00154	413	5	422	10	471	37	413	5	102.179
sam.17	217.43	234.61	0.926772	0.06682	0.001	0.51809	0.02207	0.05624	0.00241	417	6	424	15	462	68	417	6	101.679
sam.18	395.59	630.08	0.627841	0.06913	0.00091	0.53696	0.01359	0.05634	0.0014	431	5	436	9	466	33	431	5	101.16
sam.19	1415.7	1258.84	1.12461	0.06788	0.00086	0.51191	0.01032	0.0547	0.00106	423	5	420	7	400	24	423	5	99.2908
sam.20	1055.92	1359.16	0.776892	0.06631	0.00083	0.49383	0.01001	0.05402	0.00105	414	5	408	7	372	24	414	5	98.5507
sam.21	1231.35	421.27	2.92295	0.06736	0.00086	0.52883	0.01118	0.05695	0.00116	420	5	431	7	490	25	420	5	102.619
sam.22	810.12	912.91	0.887404	0.06627	0.00084	0.48799	0.01072	0.05341	0.00114	414	5	404	7	346	28	414	5	97.5845
sam.23	367.62	705.96	0.520738	0.06593	0.00086	0.48828	0.01241	0.05372	0.00134	412	5	404	8	359	34	412	5	98.0583
sam.24	228.18	351.6	0.648976	0.06727	0.00093	0.5373	0.01763	0.05794	0.0019	420	6	437	12	527	48	420	6	104.048
sam.25	384.62	736.46	0.522255	0.06792	0.00089	0.52665	0.01321	0.05625	0.00139	424	5	430	9	462	33	424	5	101.415
sam.26	621.42	891.72	0.696878	0.06811	0.00087	0.53766	0.0117	0.05726	0.00121	425	5	437	8	502	26	425	5	102.824
sam.27	126.59	259.69	0.487466	0.07267	0.00106	0.5734	0.02223	0.05724	0.00223	452	6	460	14	501	60	452	6	101.77
sam.28	803.13	1287.2	0.623936	0.06627	0.00084	0.5043	0.01012	0.0552	0.00106	414	5	415	7	420	23	414	5	100.242
sam.29	145.72	459.88	0.316865	0.06674	0.0009	0.52217	0.01506	0.05676	0.00163	416	5	427	10	482	40	416	5	102.644
sam.30	125.26	198.91	0.629732	0.0686	0.00105	0.53928	0.02452	0.05703	0.00261	428	6	438	16	493	73	428	6	102.336
sam.31	93.51	181.87	0.514158	0.06349	0.00102	0.47195	0.02623	0.05392	0.00302	397	6	393	18	368	96	397	6	98.9924
sam.32	124.47	212.26	0.586403	0.06609	0.00106	0.47229	0.02491	0.05184	0.00276	413	6	393	17	278	91	413	6	95.1574
sam.33	180.3	289.21	0.623422	0.06668	0.00096	0.49705	0.01987	0.05408	0.00217	416	6	410	13	374	64	416	6	98.5577
sam.34	80.9	159.36	0.507656	0.06772	0.00113	0.54172	0.03	0.05803	0.00325	422	7	440	20	531	92	422	7	104.265
sam.35	591.07	1086.73	0.543898	0.06735	0.00086	0.50409	0.01103	0.05429	0.00115	420	5	414	7	383	27	420	5	98.5714
Bt-monzogranite sample LJ2020-25
sam.01	284.51	696.22	0.40865	0.0712	0.00092	0.58029	0.01274	0.05911	0.00126	443	6	465	8	571	26	443	6	104.966
sam.02	290.42	939.92	0.308984	0.07323	0.00095	0.53597	0.01242	0.05308	0.0012	456	6	436	8	332	30	456	6	95.614
sam.03	179.75	747.3	0.240533	0.07402	0.00097	0.52207	0.01287	0.05115	0.00124	460	6	427	9	248	33	460	6	92.8261
sam.04	213.36	824.52	0.258769	0.07146	0.00092	0.54028	0.01192	0.05483	0.00118	445	6	439	8	405	27	445	6	98.6517
sam.05	132.81	549.71	0.2416	0.07311	0.00097	0.56967	0.01492	0.05651	0.00146	455	6	458	10	472	35	455	6	100.659
sam.06	233.42	808.86	0.288579	0.07134	0.00093	0.54584	0.01264	0.05549	0.00126	444	6	442	8	432	29	444	6	99.5495
sam.07	292.47	872.55	0.33519	0.07386	0.00096	0.54913	0.0127	0.05392	0.00122	459	6	444	8	368	29	459	6	96.732
sam.08	175.4	725.3	0.241831	0.07191	0.00094	0.55813	0.01309	0.05629	0.00129	448	6	450	9	464	29	448	6	100.446
sam.09	212.29	727.99	0.291611	0.07171	0.00093	0.54127	0.01265	0.05474	0.00125	446	6	439	8	402	30	446	6	98.4305
sam.10	258.66	878.14	0.294554	0.07286	0.00094	0.56873	0.0124	0.05661	0.0012	453	6	457	8	476	26	453	6	100.883
sam.11	283.63	977.53	0.29015	0.07332	0.00094	0.5623	0.01197	0.05562	0.00115	456	6	453	8	437	26	456	6	99.3421
sam.12	240.34	500.43	0.480267	0.07114	0.00096	0.55678	0.01545	0.05676	0.00156	443	6	449	10	482	38	443	6	101.354
sam.13	215.08	866.19	0.248306	0.07282	0.00094	0.56829	0.01286	0.0566	0.00125	453	6	457	8	476	28	453	6	100.883
sam.14	299.48	768.28	0.389806	0.0731	0.00095	0.56165	0.01291	0.05573	0.00125	455	6	453	8	442	29	455	6	99.5604
sam.15	221.29	793.22	0.278977	0.07242	0.00094	0.54155	0.0126	0.05424	0.00123	451	6	439	8	381	30	451	6	97.3392
sam.16	192.18	734.79	0.261544	0.0721	0.00094	0.54105	0.01295	0.05443	0.00128	449	6	439	9	389	31	449	6	97.7728
sam.17	196	702.69	0.278928	0.07275	0.00096	0.55019	0.01412	0.05485	0.00139	453	6	445	9	406	34	453	6	98.234
sam.18	188.83	693.64	0.272231	0.07111	0.00094	0.5502	0.01397	0.05612	0.0014	443	6	445	9	457	33	443	6	100.451
sam.19	220.38	742.54	0.296792	0.07384	0.00096	0.57055	0.01362	0.05604	0.00131	459	6	458	9	454	30	459	6	99.7821
sam.20	246.84	856.08	0.288338	0.07252	0.00093	0.5306	0.01189	0.05307	0.00116	451	6	432	8	332	28	451	6	95.7871
sam.21	195.61	733.8	0.266571	0.07192	0.00093	0.55714	0.013	0.05618	0.00128	448	6	450	8	459	29	448	6	100.446
sam.22	201.45	570.74	0.352963	0.0716	0.00096	0.52596	0.01522	0.05328	0.00153	446	6	429	10	341	41	446	6	96.1883
sam.23	479.19	1082.04	0.442858	0.07387	0.00094	0.56508	0.0113	0.05548	0.00107	459	6	455	7	432	23	459	6	99.1285
sam.24	207.23	541.39	0.382774	0.07299	0.00096	0.54546	0.01407	0.0542	0.00138	454	6	442	9	379	35	454	6	97.3568
sam.25	219.52	768.39	0.285688	0.07336	0.00094	0.55093	0.01249	0.05447	0.0012	456	6	446	8	391	29	456	6	97.807
Diorite sample LJ2020-46
sam.01	178.62	281.43	0.634687	0.07343	0.00106	0.5577	0.01943	0.05507	0.00192	457	6	450	13	415	52	457	6	98.4683
sam.02	201.54	411.15	0.490186	0.06629	0.00092	0.63897	0.01699	0.06989	0.00184	414	6	502	11	925	32	414	6	121.256
sam.03	137.32	342.11	0.401391	0.07175	0.00101	0.53048	0.01765	0.05361	0.00178	447	6	432	12	355	50	447	6	96.6443
sam.04	473.16	496.95	0.952128	0.06957	0.00095	0.51429	0.01423	0.0536	0.00146	434	6	421	10	354	38	434	6	97.0046
sam.05	104.32	201.64	0.517358	0.07027	0.00112	0.53614	0.02574	0.05532	0.00268	438	7	436	17	425	79	438	7	99.5434
sam.06	206.11	370.01	0.557039	0.06817	0.00097	0.51845	0.01749	0.05514	0.00185	425	6	424	12	418	50	425	6	99.7647
sam.07	152.84	328.96	0.464616	0.07091	0.00101	0.54166	0.01833	0.05539	0.00187	442	6	440	12	428	50	442	6	99.5475
sam.08	280.41	328.42	0.853815	0.07456	0.00106	0.57841	0.01929	0.05625	0.00187	464	6	463	12	462	49	464	6	99.7845
sam.09	181.66	255.63	0.710636	0.07926	0.00127	0.62443	0.02819	0.05713	0.0026	492	8	493	18	497	71	492	8	100.203
sam.10	152.99	341.63	0.447824	0.06995	0.00099	0.5373	0.01753	0.0557	0.00181	436	6	437	12	440	47	436	6	100.229
sam.11	125.63	309	0.40657	0.06831	0.00099	0.51899	0.01817	0.0551	0.00193	426	6	424	12	416	52	426	6	99.5305
sam.12	184.76	335.59	0.550553	0.0662	0.00096	0.55882	0.01964	0.06121	0.00215	413	6	451	13	647	51	413	6	109.201
sam.13	323.65	657.99	0.491877	0.06814	0.00093	0.59933	0.01513	0.06379	0.00158	425	6	477	10	735	31	425	6	112.235
sam.14	292.5	535	0.546729	0.06709	0.00092	0.50861	0.0141	0.05497	0.0015	419	6	418	9	411	38	419	6	99.7613
sam.15	221.89	500.64	0.443213	0.06794	0.00093	0.51493	0.01414	0.05496	0.00149	424	6	422	9	411	37	424	6	99.5283
sam.16	536.59	822.31	0.65254	0.07469	0.00098	0.57975	0.01294	0.05629	0.00122	464	6	464	8	464	27	464	6	100
sam.17	127.84	285.82	0.447275	0.06683	0.00097	0.50863	0.01883	0.05519	0.00204	417	6	418	13	420	57	417	6	100.24
sam.18	256.19	455.54	0.562387	0.06859	0.00094	0.50008	0.01434	0.05287	0.0015	428	6	412	10	323	40	428	6	96.2617
sam.19	126.6	273.51	0.462872	0.06828	0.001	0.51062	0.01969	0.05423	0.00209	426	6	419	13	381	60	426	6	98.3568
sam.20	223.02	374.21	0.595976	0.06921	0.00099	0.5317	0.01777	0.05571	0.00186	431	6	433	12	441	49	431	6	100.464
Granite sample LJ2020-38
sam.01	98.24	257.5	0.381515	0.06772	0.00101	0.50587	0.02139	0.05418	0.0023	422	6	416	14	379	68	422	6	98.5782
sam.02	383.36	1062.41	0.36084	0.0691	0.00088	0.52325	0.01117	0.05492	0.00114	431	5	427	7	409	26	431	5	99.0719
sam.03	147.74	462.8	0.319231	0.06847	0.00093	0.51771	0.01574	0.05484	0.00166	427	6	424	11	406	44	427	6	99.2974
sam.04	217.39	513.34	0.423482	0.06767	0.00091	0.49262	0.01471	0.0528	0.00157	422	5	407	10	320	43	422	5	96.4455
sam.05	245	647.02	0.378659	0.06873	0.00093	0.52931	0.01974	0.05586	0.00222	429	6	431	13	447	90	429	6	100.466
sam.06	164.79	419.67	0.392666	0.06897	0.00095	0.5076	0.01625	0.05338	0.0017	430	6	417	11	345	47	430	6	96.9767
sam.07	381.36	817.07	0.466741	0.06842	0.00088	0.48736	0.01114	0.05166	0.00115	427	5	403	8	270	30	427	5	94.3794
sam.08	311.5	837.9	0.371763	0.07511	0.00107	0.61421	0.02018	0.05931	0.00195	467	6	486	13	578	47	467	6	104.069
sam.09	142.6	387.05	0.368428	0.06592	0.00091	0.48643	0.01627	0.05352	0.00179	412	6	402	11	351	51	412	6	97.5728
sam.10	162.65	422.65	0.384834	0.06906	0.00096	0.4908	0.01622	0.05155	0.0017	430	6	405	11	266	50	430	6	94.186
sam.11	116.15	332.26	0.349576	0.06666	0.00095	0.48455	0.01838	0.05272	0.002	416	6	401	13	317	60	416	6	96.3942
sam.12	241.24	539.48	0.447171	0.0718	0.00116	0.57517	0.03292	0.0581	0.00345	447	7	461	21	534	134	447	7	103.132
sam.13	155.54	502.08	0.309791	0.06775	0.00091	0.51658	0.01504	0.0553	0.0016	423	5	423	10	424	41	423	5	100
sam.14	106	348.05	0.304554	0.06618	0.00093	0.48941	0.0173	0.05364	0.0019	413	6	405	12	356	54	413	6	98.063
sam.15	137.37	473.62	0.290043	0.06958	0.00097	0.55175	0.01794	0.05751	0.00187	434	6	446	12	511	47	434	6	102.765
sam.16	187.78	642.57	0.292233	0.06502	0.00088	0.50237	0.01446	0.05604	0.0016	406	5	413	10	454	40	406	5	101.724
sam.17	217.36	736.39	0.29517	0.07712	0.00116	0.63534	0.02432	0.05975	0.0023	479	7	499	15	595	57	479	7	104.175
sam.18	174.28	483.54	0.360425	0.06651	0.0009	0.50556	0.01511	0.05513	0.00164	415	5	415	10	417	43	415	5	100
sam.19	135.9	353.34	0.384615	0.06544	0.00093	0.46539	0.01693	0.05158	0.00188	409	6	388	12	267	57	409	6	94.8655
sam.20	229.79	571.94	0.401773	0.06813	0.00092	0.49771	0.01442	0.05298	0.00152	425	6	410	10	328	41	425	6	96.4706
sam.21	115.97	505.98	0.229199	0.06815	0.00091	0.5111	0.01381	0.0544	0.00145	425	5	419	9	388	37	425	5	98.5882
sam.22	266.55	932.39	0.285878	0.07467	0.00102	0.60161	0.01699	0.05844	0.00164	464	6	478	11	546	38	464	6	103.017
sam.23	150.8	339.3	0.444444	0.06496	0.00091	0.51607	0.01746	0.05762	0.00195	406	6	423	12	515	50	406	6	104.187
sam.24	210.15	488.8	0.42993	0.06697	0.0009	0.48802	0.01429	0.05285	0.00154	418	5	404	10	322	42	418	5	96.6507
sam.25	295.24	1682.4	0.175487	0.06807	0.00085	0.7209	0.01171	0.07682	0.00116	425	5	551	7	1117	15	425	5	129.647
Granite sample LY1908-80
sam.01	43.84	126.94	0.34536	0.0447	0.00089	0.32599	0.03043	0.05298	0.00499	282	5	286	23	328	175	282	5	101.418
sam.02	218.65	259.77	0.841706	0.04345	0.0007	0.33552	0.01775	0.0561	0.00299	274	4	294	13	456	89	274	4	107.299
sam.03	39.24	103.99	0.377344	0.04763	0.00129	0.3483	0.04481	0.05313	0.00693	300	8	303	34	334	240	300	8	101
sam.04	167	120.93	1.38096	0.04237	0.00109	0.51404	0.04226	0.08814	0.00746	268	7	421	28	1386	119	268	7	157.09
sam.05	43.6	129.44	0.336836	0.04327	0.00082	0.32291	0.02853	0.05422	0.00483	273	5	284	22	380	166	273	5	104.029
sam.06	39.88	117.62	0.339058	0.04413	0.0009	0.32388	0.03221	0.05332	0.00535	278	6	285	25	342	188	278	6	102.518
sam.07	45.13	121.32	0.371991	0.04351	0.00088	0.2993	0.03022	0.04998	0.00509	275	5	266	24	194	190	275	5	96.7273
sam.08	930.43	683.06	1.36215	0.05031	0.00084	0.36626	0.01909	0.0529	0.00279	316	5	317	14	325	88	316	5	100.316
sam.09	177.15	529.4	0.334624	0.06941	0.00096	0.55225	0.02047	0.0577	0.00228	433	6	446	13	518	89	433	6	103.002
sam.10	38.21	110.16	0.346859	0.04654	0.00124	0.35863	0.04394	0.05599	0.00696	293	8	311	33	452	226	293	8	106.143
sam.11	25.4	82.86	0.306541	0.04516	0.00103	0.33222	0.03852	0.05346	0.00626	285	6	291	29	348	220	285	6	102.105
sam.12	20.84	60.88	0.342313	0.0437	0.00138	0.3212	0.05547	0.05341	0.00933	276	9	283	43	346	318	276	9	102.536
sam.13	52.37	137.66	0.38043	0.045	0.00085	0.32622	0.02573	0.05268	0.0042	284	5	287	20	315	145	284	5	101.056
sam.14	104.76	247.52	0.423239	0.04579	0.00075	0.32629	0.01844	0.05179	0.00295	289	5	287	14	276	100	289	5	99.308
sam.15	104.01	143.26	0.726023	0.04566	0.00095	0.3095	0.03342	0.04926	0.00536	288	6	274	26	160	204	288	6	95.1389
sam.16	30.6	89.28	0.342742	0.04383	0.00098	0.30279	0.03743	0.05021	0.00626	277	6	269	29	205	233	277	6	97.1119
sam.17	114.48	181.26	0.631579	0.04619	0.00078	0.317	0.02312	0.04988	0.00366	291	5	280	18	189	133	291	5	96.2199
sam.18	44.58	129.56	0.344088	0.04408	0.00085	0.33753	0.02884	0.05565	0.0048	278	5	295	22	438	157	278	5	106.115
sam.19	57.88	119.93	0.482615	0.04569	0.00087	0.33318	0.02985	0.05299	0.00479	288	5	292	23	328	168	288	5	101.389
sam.20	94.98	395.81	0.239964	0.07429	0.00104	0.57929	0.01807	0.05667	0.00176	462	6	464	12	479	44	462	6	100.433
sam.21	171.89	406.91	0.422428	0.07172	0.001	0.56045	0.01745	0.0568	0.00176	447	6	452	11	484	44	447	6	101.119
sam.22	613.95	2435.85	0.252048	0.07191	0.00092	0.58996	0.01399	0.0595	0.0016	448	6	471	9	586	60	448	6	105.134
sam.23	76.81	166.79	0.460519	0.04802	0.0011	0.42317	0.04477	0.06392	0.00692	302	7	358	32	739	239	302	7	118.543
sam.24	31.29	108.44	0.288547	0.04615	0.00097	0.32704	0.03741	0.0515	0.00594	291	6	287	29	263	219	291	6	98.6254
sam.25	29.1	89.63	0.324668	0.04237	0.00114	0.29242	0.04424	0.05016	0.00766	268	7	260	35	202	272	268	7	97.0149
